# Supplementary material for: Aging Relevant Metabolite Itaconate Inhibits Inflammatory Bone Loss
Source: Front Endocrinol (Lausanne). 2022 Jul 22;13:885879. doi: 10.3389/fendo.2022.885879 (PMC9353012; doi:10.3389/fendo.2022.885879)
Supplement: Supplementary file 1 [file Table_1.xlsx]

## Sheet: Sheet1
Figure 1b
		2m			24m
	d0	0	0	0	0	0	0
	d3	1	0	1	8	12	11
	d5	9	14	12	89	112	106
	d7	100	91	120	295	246	309
Figure 1c
	2m			24m
	0.998921	0.937938	1.10079	3.92068	4.12809	4.57759
Figure 1d
	0h			12h			24h			48h
	Mean	SEM	N	Mean	SEM	N	Mean	SEM	N	Mean	SEM	N
	1	0.03671	3	3.38997	0.28489	3	1.76197	0.07687	3	0.89745	0.02415	3
Figure 1e
	0h			12h			24h			48h
	Mean	SEM	N	Mean	SEM	N	Mean	SEM	N	Mean	SEM	N
	1	0.10477	3	12.5657	0.31821	3	5.90156	0.30587	3	4.77546	0.15876	3
Figure 1f
		2m			24m
	0h	0.998921	0.937938	1.10079	3.92068	4.12809	4.57759
	6h	25.5562	19.9701	31.6704	14.014	10.2644	18.475
	12h	188.171	251.661	191.848	103.622	130.77	101.209
	24h	138.49	125.07	116.576	30.1598	41.5155	41.3331
	48h	40.7748	51.8242	42.5613	25.8282	24.4582	12.3618
Figure 2b
	0	5uM	10uM	20uM
	342	191	80	30
	300	168	120	24
	293	150	109	10
Figure 2d
	0	5uM	10uM	20uM
	150	86	25	8
	183	103	40	6
	200	100	32	4
		0M DI			RANKL+0M DI			RANKL+5M DI			RANKL+10M DI			RANKL+20M DI
		Mean	SEM	N	Mean	SEM	N	Mean	SEM	N	Mean	SEM	N	Mean	SEM	N
Figure 2e	Cathepsin K	1	0.05846	3	40.5149	2.82648	3	18.353	0.78646	3	15.457	0.70965	3	7.72975	0.29077	3
Figure 2f	MMP9	1	0.08713	3	70.9693	6.97703	3	39.2405	0.91244	3	23.3977	2.39053	3	12.8295	2.14271	3
Figure 2g	NFATc1	1	0.06973	3	2.33125	0.16267	3	1.45753	0.07648	3	1.35513	0.06576	3	1.07082	0.04612	3
Figure 2h	TRAP	1	0.06737	3	2.49216	0.17189	3	2.11979	0.09099	3	1.7713	0.0867	3	1.47346	0.05571	3
Figure 3b
	0M	5M	10M	20M
	64	38	12	4
	58	31	9	3
	44	26	6	1
Figure 3d
	0M	5M	10M	20M
	71.693	51.463	35.233	12.17
	80.253	43.125	31.234	11.327
	66.231	48.268	28.462	10.264
Figure 4b
	Sham + Veh						Sham + DI						LPS + Veh						LPS + DI
	0.5235	0.4723	0.3568	0.81236	0.2136	0.4236	0.8795	0.1254	0.3654	0.3658	0.4587	0.6231	8.0325	9.1548	10.3265	7.1523	10.3658	6.1258	2.0325	1.0325	3.1256	2.1658	3.1254	4.1254
Figure 4d
	Sham + Veh						Sham + DI						LPS + Veh						LPS + DI
	0.8532	0.7136	1.2303	0.9426	0.7456	1.3562	1.6542	0.4563	0.8456	0.9125	0.4235	0.7452	7.0325	6.1253	7.3215	5.1256	4.1236	6.3251	3.1254	4.0325	2.0325	1.9523	3.2154	3.74523
Figure 5c
		RANKL+Veh			RANKL+DI(20M)
	p-IKK/ / IKK	1	0.8	1.2	0.175442	0.12265	0.203255
	p-IB / IB	1	1.1	0.9	0.18511	0.242365	0.14562
	p-P65 / P65	1	1.15	0.85	0.649623	0.54236	0.79235
	p-ERK / ERK	1	1.07	0.93	2.17204	2.3458	1.8459
	p-JNK / JNK	1	1.12	0.88	0.25347	0.19254	0.4032
	p-P38 / P38	1	1.14	0.86	0.360855	0.28654	0.47265
